# Supplementary material for: Scaling up a school-based intervention to increase physical activity and reduce sedentary behaviour in children: protocol for the TransformUs hybrid effectiveness–implementation trial
Source: PubMed Central journal article supplement — BMJ Open. 2023 Oct 31;13(10):e078410. doi: 10.1136/bmjopen-2023-078410 (PMC10618986; doi:10.1136/bmjopen-2023-078410), 2023-10-31
Supplement: bmjopen-2023-078410supp003.pdf [file bmjopen-2023-078410supp003.pdf]

Supplementary File 3. *TransformUs* implementation and scale up strategies

| # | Strategy                                                               | Definition                                                                                                                                                | Actors<br>(those who deliver imp strategy)                                               | Action<br>(specific action or process)                                                                                                                                  | Action target<br>(who its meant to affect)                                                                                 | Implementation outcome(s) affected                                                                | Temporality and dose                                                                                | Justification                                                                                                                                                                                                          |
|---|------------------------------------------------------------------------|-----------------------------------------------------------------------------------------------------------------------------------------------------------|------------------------------------------------------------------------------------------|-------------------------------------------------------------------------------------------------------------------------------------------------------------------------|----------------------------------------------------------------------------------------------------------------------------|---------------------------------------------------------------------------------------------------|-----------------------------------------------------------------------------------------------------|------------------------------------------------------------------------------------------------------------------------------------------------------------------------------------------------------------------------|
| 1 | <b>Formative work with stakeholders</b>                                | Research-practice partnership to identify strategies, barriers/facilitators to program dissemination, implementation and sustainability at scale          | <i>TransformUs</i> research team with State-level partner organisations (support system) | Multiple stakeholder workshops to explore aspects of the support system and delivery context<br><br>Co-develop resources and strategies for implementation and scale up | State-level partner organisations (system level)<br><br>School principals and teachers (organisational/ implementer level) | Program reach and adoption, degree of implementation and sustainability                           | Over 6 months prior to state-wide implementation and scale up                                       | Can enhance implementation by ensuring system level goals and objectives are established and priorities aligned <sup>1</sup> , and organisational implementation capacities and structures are considered <sup>2</sup> |
| 2 | <b>Creation of coalitions and networks for program/policy advocacy</b> | Active engagement with State education decision-makers, engaging opinion leaders (in government and non-government) to support and endorse implementation | State-level partner organisations (support system)                                       | Consultation with key state-level stakeholders and decision makers to align program with state-level targets (e.g. Vic Education State target)                          | State-level partner organisations (system level)<br><br>School principals and teachers (delivery system)                   | State-level program and implementation sustainability<br><br>Organisational level reach/ adoption | Formal annual/ bi-annual stakeholder meetings<br><br>Informal pursuit of opportunities over 5 years | Use of existing networks provides ongoing opportunities for training/ program promotion <sup>2</sup> . Formative work suggests promotes legitimacy, and implementation                                                 |

| # | Strategy                                                        | Definition                                                                                                                   | Actors<br>(those who deliver imp strategy)                                                                 | Action<br>(specific action or process)                                                                                                                       | Action target<br>(who its meant to affect)                          | Implementation outcome(s) affected                                                                                                                         | Temporality and dose                                                                                                       | Justification                                                                                                                                                                           |
|---|-----------------------------------------------------------------|------------------------------------------------------------------------------------------------------------------------------|------------------------------------------------------------------------------------------------------------|--------------------------------------------------------------------------------------------------------------------------------------------------------------|---------------------------------------------------------------------|------------------------------------------------------------------------------------------------------------------------------------------------------------|----------------------------------------------------------------------------------------------------------------------------|-----------------------------------------------------------------------------------------------------------------------------------------------------------------------------------------|
|   |                                                                 |                                                                                                                              |                                                                                                            |                                                                                                                                                              |                                                                     |                                                                                                                                                            |                                                                                                                            | infrastructure for schools                                                                                                                                                              |
| 3 | <b>Utilise multiple dissemination routes/channels</b>           | Program dissemination and promotion will occur via multiple channels known to have high reach among relevant decision-makers | State-level partner organisations (support system)<br><br>School principals and teachers (delivery system) | Program launch with media involvement. Dissemination via web links, email listservs, newsletters, teacher prof. learning networks, conferences and workshops | <i>TransformUs</i> school principals and teachers (delivery system) | Program reach and adoption                                                                                                                                 | Ongoing over 5 years                                                                                                       | Multiple dissemination routes can widen scale up reach <sup>2</sup>                                                                                                                     |
| 4 | <b>Online program training to build implementation capacity</b> | Teachers required to complete online training prior to gaining access to program materials, implementation resources         | <i>TransformUs</i> school principals and teachers (delivery system)                                        | Completion of online training provides a unique log-in for access to online resources                                                                        | <i>TransformUs</i> school principals and teachers (delivery system) | Online to maximise reach and adoption<br><br>Training to enhance implementation (e.g. implementer skills, knowledge, self-efficacy to implement, perceived | ~30minutes after registration and prior to accessing program materials.<br><br>On completed, unlimited access over 5 years | To increase implementation capacity <sup>3</sup> , skills, knowledge, self-efficacy, perceived fit with existing practices, relative advantage, and ownership of program <sup>4-6</sup> |

| # | Strategy                                                           | Definition                                                                                                                                                                                                   | Actors<br>(those who deliver imp strategy)                                               | Action<br>(specific action or process)                                                                                      | Action target<br>(who its meant to affect)                                                                | Implementation outcome(s) affected                                                                                       | Temporality and dose | Justification                                                                                                                                                            |
|---|--------------------------------------------------------------------|--------------------------------------------------------------------------------------------------------------------------------------------------------------------------------------------------------------|------------------------------------------------------------------------------------------|-----------------------------------------------------------------------------------------------------------------------------|-----------------------------------------------------------------------------------------------------------|--------------------------------------------------------------------------------------------------------------------------|----------------------|--------------------------------------------------------------------------------------------------------------------------------------------------------------------------|
|   |                                                                    |                                                                                                                                                                                                              |                                                                                          |                                                                                                                             |                                                                                                           | relative advantage, fit, ownership and sustainability of delivery)                                                       |                      |                                                                                                                                                                          |
| 5 | <b>Online platform for program materials and training</b>          | All program materials, training, resources and data collection housed within an online platform aimed at schools, teachers and families. Schools and teachers must register to access training and materials | <i>TransformUs</i> research team with State-level partner organisations (support system) | Website hosted and maintained by <i>TransformUs</i> research team, link disseminated by all partner organisations.          | School principals and teachers (delivery system)<br><br>Parents of children at <i>TransformUs</i> schools | Reach, adoption                                                                                                          | Ongoing over 5 years | Maximises potential program dissemination/ implementation <sup>7</sup> . Enables more efficient data collection, refinements to materials and resource updates over time |
| 6 | <b>Enable implementation flexibility and contextual adaptation</b> | Non-prescriptive approach to implementation. Schools and teachers encouraged via training and in resources to adapt program                                                                                  | <i>TransformUs</i> research team with State-level partner organisations (support system) | Resources include modifiable lesson plans and 'example' ways of delivering strategies (e.g. active breaks). Training videos | School principals and teachers (delivery system)                                                          | Adoption, implementation (e.g. perceived appropriateness, acceptability, feasibility) and sustainability (e.g. org-level | Ongoing over 5 years | Adaptability associated with increased effectiveness/ sustainability of real-world interventions <sup>8</sup> . <i>TransformUs</i> RCT showed                            |

| # | Strategy                                                       | Definition                                                                                                                                  | Actors<br>(those who deliver imp strategy)                                               | Action<br>(specific action or process)                                                                                                                                                                                                                         | Action target<br>(who its meant to affect)                                                                                | Implementation outcome(s) affected       | Temporality and dose | Justification                                                                                                                                     |
|---|----------------------------------------------------------------|---------------------------------------------------------------------------------------------------------------------------------------------|------------------------------------------------------------------------------------------|----------------------------------------------------------------------------------------------------------------------------------------------------------------------------------------------------------------------------------------------------------------|---------------------------------------------------------------------------------------------------------------------------|------------------------------------------|----------------------|---------------------------------------------------------------------------------------------------------------------------------------------------|
|   |                                                                | strategies for setting relevance                                                                                                            |                                                                                          | illustrate ways of adapting program to different contexts                                                                                                                                                                                                      |                                                                                                                           | program embeddedness)                    |                      | differences in implementation unrelated to efficacy <sup>9</sup>                                                                                  |
| 7 | <b>Enable both ‘top-down’ and ‘bottom-up’ program adoption</b> | School-level adoption not required for teacher-level implementation. Schools and teachers can register to deliver the program independently | <i>TransformUs</i> research team with State-level partner organisations (support system) | Schools and teachers register via the program website. At registration schools encouraged to invite all teachers, and teachers encouraged to advocate for senior leadership support. Parents can advocate for school adoption. Template email invites provided | <i>TransformUs</i> school principals, teachers (delivery system)<br><br>Parents of children at <i>TransformUs</i> schools | Reach and adoption                       | Ongoing over 5 years | Capturing both individual and organisational innovation-decision processes, can elucidate influences on adoption and implementation <sup>10</sup> |
| 8 | <b>Utilise existing resources in the delivery system</b>       | Program strategies can use existing school resources, equipment and                                                                         | <i>TransformUs</i> research team with State-level partner                                | Program training and resources include ways of using/adapting existing school                                                                                                                                                                                  | <i>TransformUs</i> school principals, teachers (delivery system)                                                          | Adoption, implementation, sustainability | Ongoing over 5 years | Using existing resources can promote sustainability <sup>2</sup> , reducing                                                                       |

| #  | Strategy                                               | Definition                                                                                                                                                                                                                      | Actors<br>(those who deliver imp strategy)       | Action<br>(specific action or process)                                                                                                                                                                    | Action target<br>(who its meant to affect)                       | Implementation outcome(s) affected | Temporality and dose                                                                                                   | Justification                                                                                                                                                  |
|----|--------------------------------------------------------|---------------------------------------------------------------------------------------------------------------------------------------------------------------------------------------------------------------------------------|--------------------------------------------------|-----------------------------------------------------------------------------------------------------------------------------------------------------------------------------------------------------------|------------------------------------------------------------------|------------------------------------|------------------------------------------------------------------------------------------------------------------------|----------------------------------------------------------------------------------------------------------------------------------------------------------------|
|    |                                                        | facilities where appropriate                                                                                                                                                                                                    | organisations (support system)                   | resources and delivering program within existing schools infrastructure to achieve effective implementation                                                                                               |                                                                  |                                    |                                                                                                                        | potential costs for schools to deliver may enhance program uptake (esp. in lower resourced schools)                                                            |
| 9  | <b>Development of recognition and incentive system</b> | Online training mapped against current teaching standards, to contribute towards teachers' annual continuing professional development (CPD) requirements. Schools encouraged to recognise Champion role during staff appraisals | School principals and teachers (delivery system) | Certificate of completion provided after training to evidence CPD hours.<br><br>Importance/role of champion promoted via online training, downloadable template position description provided for schools | <i>TransformUs</i> school principals, teachers (delivery system) | All RE-AIM dimensions              | Certificate provided on completion of online training. Champion recruitment determined by school, ongoing over 5 years | Positive incentives may be necessary for widespread adoption and delivery <sup>1</sup> . Formative work identified CPD as an incentive for training completion |
| 10 | <b>Alignment with existing state-</b>                  | Program aligned with the                                                                                                                                                                                                        | <i>TransformUs</i> research team                 | <i>TransformUs</i> included as part                                                                                                                                                                       | <i>TransformUs</i> school                                        | Reach, adoption, implementation    | Program aligned with                                                                                                   | Interventions which align with                                                                                                                                 |

| #  | Strategy                                | Definition                                                                                                                                                                     | Actors<br>(those who deliver imp strategy)                                                                        | Action<br>(specific action or process)                                                                                              | Action target<br>(who its meant to affect)                                 | Implementation outcome(s) affected          | Temporality and dose                                                                                                                                                                                         | Justification                                                                                                                                                                                            |
|----|-----------------------------------------|--------------------------------------------------------------------------------------------------------------------------------------------------------------------------------|-------------------------------------------------------------------------------------------------------------------|-------------------------------------------------------------------------------------------------------------------------------------|----------------------------------------------------------------------------|---------------------------------------------|--------------------------------------------------------------------------------------------------------------------------------------------------------------------------------------------------------------|----------------------------------------------------------------------------------------------------------------------------------------------------------------------------------------------------------|
|    | <b>level initiatives and guidelines</b> | Victorian Achievement Program to count towards program physical activity benchmarks for schools. Program materials (e.g. health lessons) aligned with the Victorian Curriculum | with State-level partner organisations (support system)                                                           | of Achievement Program materials and promotion. Alignment with Victorian Curriculum promoted via website and in training            | principals, teachers (delivery system)                                     |                                             | Achievement Program for 3 years as part of planned promotion phase. Alignment to Curriculum guidelines updated as necessary over 5 years                                                                     | state or national priorities/goals are more likely to gain political/administrative support required for scale up <sup>2</sup>                                                                           |
| 11 | <b>Promote use of program champions</b> | Schools identify champion(s) who advocate for are a point of contact for staff, students and families regarding <i>TransformUs</i> implementation                              | <i>TransformUs</i> champion/ teachers (delivery system)<br><br>State-level partner organisations (support system) | Template champion position description provided to schools after registration. Online training encourages teachers to self-nominate | <i>TransformUs</i> school principals, champion/ teachers (delivery system) | Adoption, implementation and sustainability | Promoted to principals and teachers during online training and on website.<br><br>Ongoing promotion via partner organisations during teacher prof. learning networks, conferences and workshops over 5 years | Champions can encourage the adoption of preventive interventions <sup>11</sup><br><br>Formal 'position description' identified in formative work as a strategy to increase legitimacy of role in schools |

| #  | Strategy                                                                             | Definition                                                                                                         | Actors<br>(those who deliver imp strategy)                          | Action<br>(specific action or process)                                                                                                                                                       | Action target<br>(who its meant to affect)                          | Implementation outcome(s) affected                                                                                                  | Temporality and dose                             | Justification                                                                                                                                                                                                       |
|----|--------------------------------------------------------------------------------------|--------------------------------------------------------------------------------------------------------------------|---------------------------------------------------------------------|----------------------------------------------------------------------------------------------------------------------------------------------------------------------------------------------|---------------------------------------------------------------------|-------------------------------------------------------------------------------------------------------------------------------------|--------------------------------------------------|---------------------------------------------------------------------------------------------------------------------------------------------------------------------------------------------------------------------|
| 12 | <b>Online implementation support network</b>                                         | Schools can access an online discussion forum to share implementation strategies and ways of overcoming barriers.  | <i>TransformUs</i> champion/teachers (delivery system)              | Online discussion forum hosted on the program website, accessible only to registered teachers/schools                                                                                        | <i>TransformUs</i> champion/teachers (delivery system)              | Adoption, implementation                                                                                                            | Ongoing for 5 years                              | Pilot trials suggested knowledge sharing can increase implementation capacity. Peer networks can increase rates of adoption <sup>11</sup>                                                                           |
| 13 | <b>Provision of resources to support implementation processes and sustainability</b> | Providing schools resources and suggested strategies to enhance implementation and sustainability in their setting | <i>TransformUs</i> school principals and teachers (delivery system) | Online video clips showing implementation, downloadable resources (e.g. active break strategies) and tools to support embedment (e.g. template school PA policy doc and implementation plan) | <i>TransformUs</i> school principals and teachers (delivery system) | Implementation (e.g. skills, knowledge and capacity to implement program) and effectiveness. Institutionalisation within the school | Post registration, available online over 5 years | Increasing general and intervention-specific capacity within support system can enhance implementation <sup>7</sup> and sustainability <sup>12</sup> . Implementation plan can increase accountability <sup>8</sup> |
| 14 | <b>Monitoring and evaluation to adjust scaling strategy,</b>                         | Multilevel data (system, organisational, implementer and                                                           | <i>TransformUs</i> research team and state-level partner            | 6 monthly monitoring of partner organisations                                                                                                                                                | State-level partner organisations (support system)                  | State-level sustainability of program promotion                                                                                     | 6-monthly monitoring over 5 years                | Monitoring and evaluation key to identifying obstacles and                                                                                                                                                          |

| # | Strategy                           | Definition                                                                                                                   | Actors<br>(those who deliver imp strategy)                                             | Action<br>(specific action or process)                                                                                                                                                                | Action target<br>(who its meant to affect)                                                                | Implementation outcome(s) affected                                                | Temporality and dose                                                                                                      | Justification                                                                                                     |
|---|------------------------------------|------------------------------------------------------------------------------------------------------------------------------|----------------------------------------------------------------------------------------|-------------------------------------------------------------------------------------------------------------------------------------------------------------------------------------------------------|-----------------------------------------------------------------------------------------------------------|-----------------------------------------------------------------------------------|---------------------------------------------------------------------------------------------------------------------------|-------------------------------------------------------------------------------------------------------------------|
|   | <b>feedback to support schools</b> | recipient level), on partner organisations. dissemination activities (type, freq. and dose) and setting-level implementation | organisations (support system)<br><br>School principals and teachers (delivery system) | dissemination activities<br><br>Recruitment for interviews and surveys embedded within program website<br><br>Schools submit implementation case studies via website; shared in quarterly newsletters | School principals and teachers (delivery system)<br><br>Parents of children at <i>TransformUs</i> schools | School-level reach, adoption, implementation and organisational level maintenance | Baseline (pre and post online training) and annually thereafter for 5 years<br><br>Requests for case studies 4 times/year | opportunities to adjust scaling approach <sup>2</sup> . Feedback can increase teacher implementation performance. |

## References

1. Koorts, H., et al., *Implementation and scale up of population physical activity interventions for clinical and community settings: the PRACTIS guide*. International Journal of Behavioral Nutrition and Physical Activity, 2018. **15**(1): p. 51.
2. World Health Organization, *Practical guidance for scaling up health service innovations*. 2009, World Health Organization: Geneva, Switzerland.
3. Leeman, J., et al., *What strategies are used to build practitioners' capacity to implement community-based interventions and are they effective?: a systematic review*. Implement Sci, 2015. **10**(1): p. 80.
4. Fleuren, M., K. Wiefferink, and T. Paulussen, *Determinants of innovation within health care organizations: literature review and Delphi study*. Int J Qual Health Care, 2004. **16**(2): p. 107-23.
5. Chaudoir, S., A. Dugan, and C. Barr, *Measuring factors affecting implementation of health innovations: a systematic review of structural, organizational, provider, patient, and innovation level measures*. Implement Sci, 2013. **8**.



6. Michie, S., et al., *From Theory to Intervention: Mapping Theoretically Derived Behavioural Determinants to Behaviour Change Techniques*. Applied Psychology, 2008. **57**(4): p. 660-680.
7. Wandersman, A., et al., *Bridging the gap between prevention research and practice: the interactive systems framework for dissemination and implementation*. Am J Community Psychol, 2008. **41**(3-4): p. 171-81.
8. Meyers, D.C., J.A. Durlak, and A. Wandersman, *The quality implementation framework: a synthesis of critical steps in the implementation process*. Am J Community Psychol, 2012. **50**(3-4): p. 462-80.
9. Koorts, H., et al., *Is level of implementation linked with intervention outcomes? Process evaluation of the TransformUs intervention to increase children's physical activity and reduce sedentary behaviour*. Int J Behav Nutr Phys Act, 2022. **19**(1): p. 122.
10. Rogers, E.M., *Diffusion of Innovations*. 3rd ed. 1983, New York: The Free Press.
11. Rogers, E.M., *Diffusion of preventive innovations*. Addictive Behaviors, 2002. **27**(6): p. 989-993.
12. Wiltsey Stirman, S., et al., *The sustainability of new programs and innovations: a review of the empirical literature and recommendations for future research*. Implement Sci, 2012. **7**: p. 17.
