# Supplementary material for: Scaling up a school-based intervention to increase physical activity and reduce sedentary behaviour in children: protocol for the TransformUs hybrid effectiveness–implementation trial
Source: PubMed Central journal article supplement — BMJ Open. 2023 Oct 31;13(10):e078410. doi: 10.1136/bmjopen-2023-078410 (PMC10618986; doi:10.1136/bmjopen-2023-078410), 2023-10-31
Supplement: bmjopen-2023-078410supp004.pdf [file bmjopen-2023-078410supp004.pdf]

## Supplementary File 4. Project timeline

| Year                                                                      | 2017 |   |   |   | 2018 |   |   |   | 2019 |   |   |   | 2020 |   |   |   | 2021 |   |   |   | 2022 |   |   |   | 2023 |   |   |   |
|---------------------------------------------------------------------------|------|---|---|---|------|---|---|---|------|---|---|---|------|---|---|---|------|---|---|---|------|---|---|---|------|---|---|---|
| Term                                                                      | 1    | 2 | 3 | 4 | 1    | 2 | 3 | 4 | 1    | 2 | 3 | 4 | 1    | 2 | 3 | 4 | 1    | 2 | 3 | 4 | 1    | 2 | 3 | 4 | 1    | 2 | 3 | 4 |
| <b>Preparation activities</b>                                             |      |   |   |   |      |   |   |   |      |   |   |   |      |   |   |   |      |   |   |   |      |   |   |   |      |   |   |   |
| Resource development original <i>TransformUs</i> website                  |      |   |   |   |      |   |   |   |      |   |   |   |      |   |   |   |      |   |   |   |      |   |   |   |      |   |   |   |
| Build original <i>TransformUs</i> website                                 |      |   |   |   |      |   |   |   |      |   |   |   |      |   |   |   |      |   |   |   |      |   |   |   |      |   |   |   |
| Launch original <i>TransformUs</i> website                                |      |   |   |   |      |   |   |   |      |   |   |   |      |   |   |   |      |   |   |   |      |   |   |   |      |   |   |   |
| Build updated <i>TransformUs</i> website                                  |      |   |   |   |      |   |   |   |      |   |   |   |      |   |   |   |      |   |   |   |      |   |   |   |      |   |   |   |
| Relaunch of <i>TransformUs</i> website                                    |      |   |   |   |      |   |   |   |      |   |   |   |      |   |   |   |      |   |   |   |      |   |   |   |      |   |   |   |
| Management of <i>TransformUs</i> website                                  |      |   |   |   |      |   |   |   |      |   |   |   |      |   |   |   |      |   |   |   |      |   |   |   |      |   |   |   |
| Build databases for both trials                                           |      |   |   |   |      |   |   |   |      |   |   |   |      |   |   |   |      |   |   |   |      |   |   |   |      |   |   |   |
| Program dissemination via partner organisations (a)                       |      |   |   |   |      |   |   |   |      |   |   |   |      |   |   |   |      |   |   |   |      |   |   |   |      |   |   |   |
| Expressions of interest in <i>TransformUs</i> (Effectiveness Trial only)  |      |   |   |   |      |   |   |   |      |   |   |   |      |   |   |   |      |   |   |   |      |   |   |   |      |   |   |   |
| Schools/teachers register via <i>TransformUs</i> website                  |      |   |   |   |      |   |   |   |      |   |   |   |      |   |   |   |      |   |   |   |      |   |   |   |      |   |   |   |
| Teachers complete mandatory online training (a)                           |      |   |   |   |      |   |   |   |      |   |   |   |      |   |   |   |      |   |   |   |      |   |   |   |      |   |   |   |
| <b>Effectiveness Trial activities</b>                                     |      |   |   |   |      |   |   |   |      |   |   |   |      |   |   |   |      |   |   |   |      |   |   |   |      |   |   |   |
| <b>CHILD/PARENT data collection</b>                                       |      |   |   |   |      |   |   |   |      |   |   |   |      |   |   |   |      |   |   |   |      |   |   |   |      |   |   |   |
| Recruit schools VIC (n=20) NSW (n=20) (a)                                 |      |   |   |   |      |   |   |   |      |   |   |   |      |   |   |   |      |   |   |   |      |   |   |   |      |   |   |   |
| BL measures VIC & NSW (a, b)                                              |      |   |   |   |      |   |   |   |      |   |   |   |      |   |   |   |      |   |   |   |      |   |   |   |      |   |   |   |
| T2 (12 month) measures VIC & NSW (b, e)                                   |      |   |   |   |      |   |   |   |      |   |   |   |      |   |   |   |      |   |   |   |      |   |   |   |      |   |   |   |
| T3 (24 month) measures VIC & NSW (b, e)                                   |      |   |   |   |      |   |   |   |      |   |   |   |      |   |   |   |      |   |   |   |      |   |   |   |      |   |   |   |
| <b>TEACHER/SCHOOL data collection</b>                                     |      |   |   |   |      |   |   |   |      |   |   |   |      |   |   |   |      |   |   |   |      |   |   |   |      |   |   |   |
| BL surveys teachers/schools VIC & NSW (a, c)                              |      |   |   |   |      |   |   |   |      |   |   |   |      |   |   |   |      |   |   |   |      |   |   |   |      |   |   |   |
| T2 (12 month) surveys and interviews teachers/schools VIC & NSW (b, d, e) |      |   |   |   |      |   |   |   |      |   |   |   |      |   |   |   |      |   |   |   |      |   |   |   |      |   |   |   |
| T3 (24 month) surveys and interviews teachers/schools VIC & NSW (b, d, e) |      |   |   |   |      |   |   |   |      |   |   |   |      |   |   |   |      |   |   |   |      |   |   |   |      |   |   |   |
| <b>Implementation Trial activities</b>                                    |      |   |   |   |      |   |   |   |      |   |   |   |      |   |   |   |      |   |   |   |      |   |   |   |      |   |   |   |
| BL surveys teachers/schools (a, b, c, d)                                  |      |   |   |   |      |   |   |   |      |   |   |   |      |   |   |   |      |   |   |   |      |   |   |   |      |   |   |   |
| T2 (12 month) surveys teachers/schools (b, d, e)                          |      |   |   |   |      |   |   |   |      |   |   |   |      |   |   |   |      |   |   |   |      |   |   |   |      |   |   |   |
| T3 (24 month) surveys teachers/schools (b, d, e)                          |      |   |   |   |      |   |   |   |      |   |   |   |      |   |   |   |      |   |   |   |      |   |   |   |      |   |   |   |
| T4 (36 month) surveys teachers/schools (b, d, e)                          |      |   |   |   |      |   |   |   |      |   |   |   |      |   |   |   |      |   |   |   |      |   |   |   |      |   |   |   |
| T2 (12 month) interviews teachers/principals (a, b, c, d, e)              |      |   |   |   |      |   |   |   |      |   |   |   |      |   |   |   |      |   |   |   |      |   |   |   |      |   |   |   |
| T3 (24 month) interviews teachers/principals (a, b, c, d, e)              |      |   |   |   |      |   |   |   |      |   |   |   |      |   |   |   |      |   |   |   |      |   |   |   |      |   |   |   |
| T4 (36 month) interviews teachers/principals (a, b, c, d, e)              |      |   |   |   |      |   |   |   |      |   |   |   |      |   |   |   |      |   |   |   |      |   |   |   |      |   |   |   |
| T2 (12 month) interviews partner organisations (a, b, c, d, e)            |      |   |   |   |      |   |   |   |      |   |   |   |      |   |   |   |      |   |   |   |      |   |   |   |      |   |   |   |
| T3 (24 month) interviews partner organisations (a, b, c, d, e)            |      |   |   |   |      |   |   |   |      |   |   |   |      |   |   |   |      |   |   |   |      |   |   |   |      |   |   |   |
| T4 (36 month) interviews partner organisations (a, b, c, d, e)            |      |   |   |   |      |   |   |   |      |   |   |   |      |   |   |   |      |   |   |   |      |   |   |   |      |   |   |   |
| Website data on online visits/downloads (a, e)                            |      |   |   |   |      |   |   |   |      |   |   |   |      |   |   |   |      |   |   |   |      |   |   |   |      |   |   |   |
| <b>Other activities</b>                                                   |      |   |   |   |      |   |   |   |      |   |   |   |      |   |   |   |      |   |   |   |      |   |   |   |      |   |   |   |
| Partner data on program dissemination/promotion (a, c, d, e)              |      |   |   |   |      |   |   |   |      |   |   |   |      |   |   |   |      |   |   |   |      |   |   |   |      |   |   |   |

(a) Reach; (b) Effectiveness; (c) Adoption; (d) Implementation; (e) Maintenance; BL=Baseline, T2=12 month follow up; T3=24 month follow up; T4=36 month follow up; NSW=New South Wales; VIC=Victoria; Red highlight indicates data could not be collected due to COVID-19 restrictions
