# Supplementary material for: Scaling up a school-based intervention to increase physical activity and reduce sedentary behaviour in children: protocol for the TransformUs hybrid effectiveness–implementation trial
Source: PubMed Central journal article supplement — BMJ Open. 2023 Oct 31;13(10):e078410. doi: 10.1136/bmjopen-2023-078410 (PMC10618986; doi:10.1136/bmjopen-2023-078410), 2023-10-31
Supplement: bmjopen-2023-078410supp005.pdf [file bmjopen-2023-078410supp005.pdf]

Supplementary File 4. RE-AIM evaluation of the *TransformUs* program at scale

| RE-AIM Dimension                              | Assessment criteria                                                                                                                                                                                                                                                                  |                                                                                                                                                                                                                                                                                                                                                                                                                                                          |                                                                                                                                                                      |                                                                                                                                                                                                  |
|-----------------------------------------------|--------------------------------------------------------------------------------------------------------------------------------------------------------------------------------------------------------------------------------------------------------------------------------------|----------------------------------------------------------------------------------------------------------------------------------------------------------------------------------------------------------------------------------------------------------------------------------------------------------------------------------------------------------------------------------------------------------------------------------------------------------|----------------------------------------------------------------------------------------------------------------------------------------------------------------------|--------------------------------------------------------------------------------------------------------------------------------------------------------------------------------------------------|
|                                               | Partners/State                                                                                                                                                                                                                                                                       | School (Principal)/Teachers                                                                                                                                                                                                                                                                                                                                                                                                                              | Parents*                                                                                                                                                             | Children*                                                                                                                                                                                        |
| <b>Implementation and Effectiveness trial</b> |                                                                                                                                                                                                                                                                                      |                                                                                                                                                                                                                                                                                                                                                                                                                                                          |                                                                                                                                                                      |                                                                                                                                                                                                  |
| <b>Reach</b>                                  | <ul style="list-style-type: none"> <li>No. partners; organisational characteristics (type)<sup>a</sup></li> <li>No., frequency and audience for promotional &amp; dissemination activities<sup>a,f,g</sup></li> <li>Perceived reach of dissemination strategy<sup>f</sup></li> </ul> | <u><b>Teacher-level</b></u> <ul style="list-style-type: none"> <li>No. teachers registered and no. completed training<sup>d</sup>, and total no. eligible teachers in Victorian schools</li> <li>Descriptive characteristics teachers; reasons for uptake; program awareness<sup>b</sup></li> </ul>                                                                                                                                                      | <ul style="list-style-type: none"> <li>No. parents participating in trial<sup>c</sup></li> <li>Descriptive characteristics; program awareness<sup>c</sup></li> </ul> | <ul style="list-style-type: none"> <li>No. students at participating schools<sup>h</sup> and no. Victorian students eligible</li> </ul>                                                          |
| <b>*Effectiveness</b>                         | /                                                                                                                                                                                                                                                                                    | /                                                                                                                                                                                                                                                                                                                                                                                                                                                        | <ul style="list-style-type: none"> <li>Proxy report of child's PA and sedentary time<sup>c</sup></li> </ul>                                                          | <ul style="list-style-type: none"> <li>Device-assessed PA and sedentary time<sup>e</sup></li> </ul>                                                                                              |
| <b>Adoption</b>                               | <ul style="list-style-type: none"> <li>Perceived barriers/facilitators/ reasons for school adoption<sup>f</sup></li> </ul>                                                                                                                                                           | <u><b>School-level</b></u> <ul style="list-style-type: none"> <li>No. schools registered and no. completed training<sup>d</sup> and total no. eligible schools in Victoria<sup>i</sup></li> <li>Descriptive characteristics schools; reasons for adoption; program awareness<sup>b</sup></li> </ul>                                                                                                                                                      | /                                                                                                                                                                    | /                                                                                                                                                                                                |
| <b>Implementation</b>                         | <ul style="list-style-type: none"> <li>Partner role in implementation<sup>f</sup></li> <li>Perceived implementation barriers/facilitators<sup>f</sup></li> </ul>                                                                                                                     | <u><b>School-level</b></u> <ul style="list-style-type: none"> <li>No. and type of <i>TransformUs</i> website visits, program component downloads<sup>d,g</sup></li> <li>Organisational infrastructure and resource availability to support implementation<sup>b</sup></li> <li>Organisational readiness and capacity to implement <i>TransformUs</i> (adapted ORIC scale)<sup>73</sup>; implementation climate<sup>74</sup> (6qu)<sup>b</sup></li> </ul> | <ul style="list-style-type: none"> <li>Dose received (no. newsletters, use newsletters)<sup>c</sup></li> </ul>                                                       | <ul style="list-style-type: none"> <li>Dose received (active lessons, active breaks, homework, health lessons, line markings)<sup>j</sup></li> <li>Perceptions of program<sup>j</sup></li> </ul> |

|                                                |                                                                                                                                                                                                                                                                                                                                                               |                                                                                                                                                                                                                                                                                                                                                                                                                                                                                                                                                                                                                                                                                                                                                                                                                                                                                  |                                                                                                                                                                                                             |                                                                                                                                                                                                      |
|------------------------------------------------|---------------------------------------------------------------------------------------------------------------------------------------------------------------------------------------------------------------------------------------------------------------------------------------------------------------------------------------------------------------|----------------------------------------------------------------------------------------------------------------------------------------------------------------------------------------------------------------------------------------------------------------------------------------------------------------------------------------------------------------------------------------------------------------------------------------------------------------------------------------------------------------------------------------------------------------------------------------------------------------------------------------------------------------------------------------------------------------------------------------------------------------------------------------------------------------------------------------------------------------------------------|-------------------------------------------------------------------------------------------------------------------------------------------------------------------------------------------------------------|------------------------------------------------------------------------------------------------------------------------------------------------------------------------------------------------------|
|                                                |                                                                                                                                                                                                                                                                                                                                                               | <ul style="list-style-type: none"> <li>• Implementation strategies; appropriateness, acceptability, barriers, and facilitators to implementation<sup>b</sup></li> <li>• Perceived impact on school culture (norms, values and beliefs); impact on child<sup>b</sup></li> </ul> <p><b><i>Teacher-level</i></b></p> <ul style="list-style-type: none"> <li>• No. and type of <i>TransformUs</i> website visits, no. program component downloads<sup>d</sup></li> <li>• No., frequency, duration of components (dose delivered), adherence and adaptation (fidelity), feasibility, appropriateness, self-efficacy to implement; satisfaction; barriers/facilitators<sup>b</sup>.</li> <li>• Implementation climate<sup>74</sup> (2qu)<sup>b</sup></li> <li>• Perceived impact on child behavioural outcomes (time on task, academic outcomes, concentration)<sup>b</sup></li> </ul> |                                                                                                                                                                                                             |                                                                                                                                                                                                      |
| <b><i>*Individual-level Maintenance</i></b>    | /                                                                                                                                                                                                                                                                                                                                                             | /                                                                                                                                                                                                                                                                                                                                                                                                                                                                                                                                                                                                                                                                                                                                                                                                                                                                                | <ul style="list-style-type: none"> <li>• Proxy report of child's PA and sitting time<sup>c</sup></li> <li>• Proxy report of impact of active homework (concentration and completion)<sup>c</sup></li> </ul> | <ul style="list-style-type: none"> <li>• Device-assessed PA and sedentary time<sup>e</sup></li> <li>• Self-reported PA and sedentary time<sup>j</sup></li> </ul>                                     |
| <b><i>Organisational-level Maintenance</i></b> | <ul style="list-style-type: none"> <li>• No. partners; organisational characteristics (type)<sup>a</sup></li> <li>• No., frequency and audience for promotional and dissemination activities<sup>a,f,g</sup></li> <li>• Perceived reach of dissemination strategy<sup>f</sup></li> <li>• Perceived barriers/facilitators to program maintenance in</li> </ul> | <p><b><i>School-level</i></b></p> <ul style="list-style-type: none"> <li>• Intention to continue<sup>b</sup></li> <li>• No. and type of <i>TransformUs</i> website visits, program component downloads<sup>g</sup></li> <li>• Organisational infrastructure and resource availability to support implementation<sup>b</sup></li> <li>• Organisational readiness and capacity to implement <i>TransformUs</i> (adapted ORIC scale)<sup>73</sup>; implementation climate<sup>74</sup> (6qu)<sup>b</sup></li> </ul>                                                                                                                                                                                                                                                                                                                                                                 | <ul style="list-style-type: none"> <li>• Program awareness; continued support<sup>c</sup></li> </ul>                                                                                                        | <ul style="list-style-type: none"> <li>• Dose received (active lessons, active breaks, homework, health lessons, line markings)<sup>j</sup></li> <li>• Perceptions of program<sup>j</sup></li> </ul> |

|  |                                                             |                                                                                                                                                                                                                                                                                                                                                                                                                                                                                                                                                                                                                                                                                              |  |  |
|--|-------------------------------------------------------------|----------------------------------------------------------------------------------------------------------------------------------------------------------------------------------------------------------------------------------------------------------------------------------------------------------------------------------------------------------------------------------------------------------------------------------------------------------------------------------------------------------------------------------------------------------------------------------------------------------------------------------------------------------------------------------------------|--|--|
|  | schools <sup>i</sup> continued program support <sup>f</sup> | <ul style="list-style-type: none"> <li>• Implementation strategies; appropriateness, acceptability, barriers and facilitators to implementation<sup>b</sup></li> </ul> <p><b><i>Teacher-level</i></b></p> <ul style="list-style-type: none"> <li>• Intention to continue<sup>b</sup></li> <li>• No. and type of <i>TransformUs</i> website visits, no. program component downloads<sup>g</sup></li> <li>• No., frequency, duration of components (dose delivered), adherence and adaptation (fidelity), feasibility, appropriateness, self-efficacy to implement, satisfaction; barriers/facilitators<sup>b</sup></li> <li>• Implementation climate<sup>74(2qu)</sup><sup>b</sup></li> </ul> |  |  |
|--|-------------------------------------------------------------|----------------------------------------------------------------------------------------------------------------------------------------------------------------------------------------------------------------------------------------------------------------------------------------------------------------------------------------------------------------------------------------------------------------------------------------------------------------------------------------------------------------------------------------------------------------------------------------------------------------------------------------------------------------------------------------------|--|--|

No. = number; <sup>a</sup>Partner self-report; <sup>b</sup>School/teacher survey/interview; <sup>c</sup>Parent survey; <sup>d</sup>TransformUs website <sup>e</sup>ActiGraph accelerometers; <sup>f</sup>Partner interviews; <sup>g</sup>Google Analytics; <sup>h</sup>Australian Bureau of Statistics data; <sup>i</sup>My Schools data (<https://www.myschool.edu.au/>); <sup>j</sup>Child survey. PA: physical activity. \*Asterisk indicates Effectiveness trial only and data are collected at baseline, 12-months and 24-months follow up.
