# Supplementary figures and images for: Scaling up a school-based intervention to increase physical activity and reduce sedentary behaviour in children: protocol for the TransformUs hybrid effectiveness–implementation trial
Source: PubMed Central journal article supplement — BMJ Open. 2023 Oct 31;13(10):e078410. doi: 10.1136/bmjopen-2023-078410 (PMC10618986; doi:10.1136/bmjopen-2023-078410), 2023-10-31

**Supplementary File 1.** Evolution of *TransformUs* (2009-2023)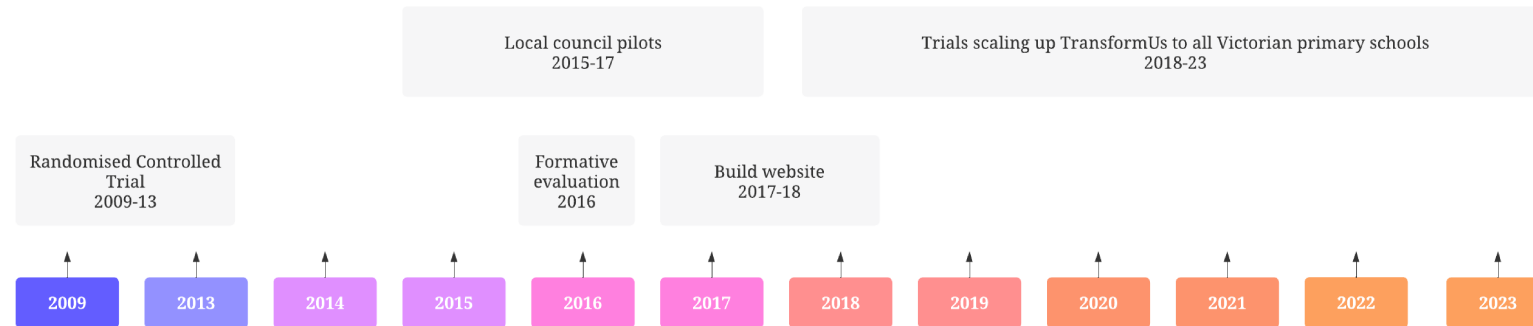

Supplement: bmjopen-2023-078410supp001.pdf [file bmjopen-2023-078410supp001.pdf]
